# Supplementary material for: Alcohol Intake and Risk of Incident Melanoma: A Pooled Analysis of Three Prospective Studies in the United States
Source: Oxford University Press journal article supplement (doi:10.1158/1055-9965.epi-16-0303), 2016-12-01
Supplement: 10559965epi160303-sup-164376_1_supp_3595946_ddqdbd.docx [file 10559965epi160303-sup-164376_1_supp_3595946_ddqdbd.docx]

**Supplementary Table S1. Characteristics of Nurses’ Health Study, Nurses’ Health Study II and Health Professionals Follow-Up Study**

|  | **Nurses’ Health Study** | **Nurses’ Health Study II** | **Health Professionals Follow-Up Study** |
| --- | --- | --- | --- |
| Abbreviations | NHS | NHS II | HPFS |
| Gender | Female | Female | Male |
| Initiation year | 1976 | 1989 | 1986 |
| Age at inception | 30-55y | 25-42y | 40-75y |
| Follow-up intervals | 2 years | 2 years | 2 years |
| Questionnaire time | June of the even year | June of the even year | January of the odd year |
| Participants at inception | 121,700 | 116,671 | 51,529 |
| Participants excluded at baseline | 48,155 | 28,291 | 3,202 |
| Participants in this analysis | 73,545 | 88,380 | 48,327 |
| Mean follow-up time | 19 years | 17 years | 15.4 years |
| Person-years in this analysis | 1,577,388 | 1,657,224 | 854,858 |
